# Supplementary material for: Fine particulate matter (PM2.5) in China at a city level
Source: Springer Nature journal article supplement (doi:10.1038/srep14884), 2015-10-15
Supplement: 41598_2015_BFsrep14884_MOESM1_ESM.pdf [file 41598_2015_BFsrep14884_MOESM1_ESM.pdf]

SUPPLEMENTARY INFORMATION

for

**Fine particulate matter (PM<sub>2.5</sub>) in China at a city level**

Yan-Lin Zhang<sup>1,\*</sup> and Fang Cao<sup>1</sup>

<sup>1</sup>Yale-NUIST Center on Atmospheric Environment, Nanjing University of Information Science  
and Technology, Nanjing10044, China

\*Corresponding Author

Phone: 0086-25-58695681; fax: 0086-25-58731193; e-mail: dryanlinzhang@gmail.com.

**Table S1.** The location, the numbers of the monitoring sites in each city and the annual mean of PM<sub>2.5</sub> concentrations in 190 cities of China. The cities are ordered from the highest to the lowest PM<sub>2.5</sub> concentrations.

| Order | City         | Province     | Number<br>s of sites | Latitude | Longitude | Population<br>(Million) | PM <sub>2.5</sub><br>( $\mu\text{g}/\text{m}^3$ ) |
|-------|--------------|--------------|----------------------|----------|-----------|-------------------------|---------------------------------------------------|
| 1     | Baoding      | Hebei        | 6                    | 38.9     | 115.5     | 11.4                    | 118.8                                             |
| 2     | Xingtai      | Hebei        | 4                    | 37.1     | 114.5     | 7.2                     | 109.6                                             |
| 3     | Shijiazhuang | Hebei        | 8                    | 38.0     | 114.5     | 10.5                    | 101.4                                             |
| 4     | Handan       | Hebei        | 4                    | 36.6     | 114.5     | 9.3                     | 100.0                                             |
| 5     | Dezhou       | Shandong     | 3                    | 37.5     | 116.3     | 5.6                     | 97.6                                              |
| 6     | Hengshui     | Hebei        | 3                    | 37.7     | 115.7     | 4.4                     | 96.5                                              |
| 7     | Liaocheng    | Shandong     | 3                    | 36.5     | 116.0     | 5.8                     | 93.9                                              |
| 8     | Zhengzhou    | Henan        | 9                    | 34.8     | 113.7     | 9.2                     | 93.2                                              |
| 9     | Heze         | Shandong     | 3                    | 35.2     | 115.5     | 8.3                     | 93.0                                              |
| 10    | Laiwu        | Shandong     | 3                    | 36.2     | 117.7     | 1.3                     | 91.8                                              |
| 11    | Tangshan     | Hebei        | 6                    | 39.6     | 118.0     | 7.7                     | 91.5                                              |
| 12    | Zibo         | Shandong     | 6                    | 36.8     | 118.1     | 4.6                     | 89.7                                              |
| 13    | Anyang       | Henan        | 5                    | 36.1     | 114.4     | 5.1                     | 89.6                                              |
| 14    | Langfang     | Hebei        | 4                    | 39.5     | 116.7     | 4.5                     | 87.8                                              |
| 15    | Linyi        | Shandong     | 4                    | 35.1     | 118.4     | 10.1                    | 85.8                                              |
| 16    | Jiaozuo      | Henan        | 4                    | 35.2     | 113.2     | 3.5                     | 84.8                                              |
| 17    | Zaozhuang    | Shandong     | 5                    | 34.9     | 117.6     | 3.8                     | 84.6                                              |
| 18    | Jinan        | Shandong     | 8                    | 36.7     | 117.0     | 6.9                     | 84.6                                              |
| 19    | Yichang      | Hubei        | 5                    | 30.7     | 111.3     | 4.1                     | 84.4                                              |
| 20    | Shouguang    | Shandong     | 2                    | 36.9     | 118.7     | 1.1                     | 84.0                                              |
| 21    | Binzhou      | Shandong     | 3                    | 37.4     | 118.0     | 3.8                     | 80.4                                              |
| 22    | Beijing      | Beijing      | 12                   | 39.9     | 116.5     | 21.1                    | 79.8                                              |
| 23    | Tianjin      | Tianjin      | 15                   | 39.1     | 117.2     | 14.7                    | 79.7                                              |
| 24    | Jining       | Shandong     | 3                    | 35.4     | 116.6     | 8.1                     | 79.1                                              |
| 25    | Pingdingshan | Henan        | 4                    | 33.8     | 113.3     | 5.0                     | 79.0                                              |
| 26    | Cangzhou     | Hebei        | 3                    | 38.3     | 116.8     | 7.3                     | 78.5                                              |
| 27    | Jingzhou     | Hubei        | 3                    | 30.3     | 112.2     | 5.7                     | 77.8                                              |
| 28    | Kaifeng      | Henan        | 4                    | 34.8     | 114.4     | 4.6                     | 74.8                                              |
| 29    | Shenyang     | Liaoning     | 11                   | 41.8     | 123.4     | 7.3                     | 74.1                                              |
| 30    | Wuhan        | Hubei        | 10                   | 30.5     | 114.3     | 10.2                    | 73.3                                              |
| 31    | Hefei        | Anhui        | 10                   | 31.9     | 117.3     | 7.6                     | 73.2                                              |
| 32    | Dongying     | Shandong     | 4                    | 37.5     | 118.5     | 2.1                     | 72.9                                              |
| 33    | Zigong       | Sichuan      | 4                    | 29.4     | 104.8     | 2.7                     | 72.6                                              |
| 34    | Weifang      | Shandong     | 5                    | 36.6     | 119.1     | 9.2                     | 72.6                                              |
| 35    | Harbin       | Heilongjiang | 12                   | 45.8     | 126.6     | 10.6                    | 72.1                                              |

| Order | City             | Province | Number<br>s of sites | Latitude | Longitude | Population<br>(Million) | PM <sub>2.5</sub><br>( $\mu\text{g}/\text{m}^3$ ) |
|-------|------------------|----------|----------------------|----------|-----------|-------------------------|---------------------------------------------------|
| 36    | Sanmenxia        | Henan    | 4                    | 34.8     | 111.2     | 2.2                     | 72.0                                              |
| 37    | Jiangyin         | Jiangsu  | 3                    | 31.9     | 120.3     | 1.2                     | 71.2                                              |
| 38    | Korla            | Xinjiang | 3                    | 41.7     | 86.1      | 0.5                     | 70.6                                              |
| 39    | Tai'an           | Shandong | 3                    | 36.2     | 117.1     | 5.5                     | 70.2                                              |
| 40    | Luoyang          | Henan    | 7                    | 34.7     | 112.4     | 6.6                     | 69.5                                              |
| 41    | Anshan           | Liaoning | 7                    | 41.1     | 122.9     | 3.5                     | 69.2                                              |
| 42    | Changsha         | Hunan    | 10                   | 28.2     | 113.0     | 7.1                     | 68.3                                              |
| 43    | Taizhou          | Jiangsu  | 4                    | 32.5     | 119.9     | 4.6                     | 68.3                                              |
| 44    | Nanjing          | Jiangsu  | 9                    | 32.0     | 118.8     | 8.1                     | 67.8                                              |
| 45    | Wuxi             | Jiangsu  | 8                    | 31.6     | 120.3     | 6.4                     | 66.4                                              |
| 46    | Changzhou        | Jiangsu  | 6                    | 31.8     | 120.0     | 4.7                     | 66.4                                              |
| 47    | Zhangjiagan<br>g | Jiangsu  | 2                    | 31.9     | 120.6     | 0.9                     | 66.0                                              |
| 48    | Zhuji            | Zhejiang | 2                    | 29.7     | 120.2     | 1.1                     | 65.1                                              |
| 49    | Xuzhou           | Jiangsu  | 7                    | 34.3     | 117.2     | 8.6                     | 64.7                                              |
| 50    | Suqian           | Jiangsu  | 4                    | 34.0     | 118.3     | 4.8                     | 64.5                                              |
| 51    | Changchun        | Jilin    | 10                   | 43.9     | 125.4     | 7.6                     | 64.4                                              |
| 52    | Suzhou           | Jiangsu  | 8                    | 31.3     | 120.6     | 10.5                    | 64.4                                              |
| 53    | Zhuzhou          | Hunan    | 7                    | 27.8     | 113.2     | 3.9                     | 64.3                                              |
| 54    | Jurong           | Jiangsu  | 2                    | 32.0     | 119.2     | 0.6                     | 64.1                                              |
| 55    | Urumchi          | Xinjiang | 7                    | 43.8     | 87.7      | 3.3                     | 64.1                                              |
| 56    | Xiangtan         | Hunan    | 7                    | 27.9     | 112.9     | 2.8                     | 63.6                                              |
| 57    | Taiyuan          | Shanxi   | 9                    | 37.9     | 112.5     | 4.3                     | 62.8                                              |
| 58    | Maanshan         | Anhui    | 5                    | 31.6     | 118.5     | 2.2                     | 62.6                                              |
| 59    | Huai'an          | Jiangsu  | 5                    | 33.5     | 119.2     | 4.8                     | 62.5                                              |
| 60    | Chengdu          | Sichuan  | 8                    | 30.7     | 104.1     | 14.3                    | 62.2                                              |
| 61    | Zhenjiang        | Jiangsu  | 4                    | 32.2     | 119.4     | 3.1                     | 61.9                                              |
| 62    | Linfen           | Shanxi   | 6                    | 36.1     | 111.5     | 4.4                     | 61.8                                              |
| 63    | Changzhi         | Shanxi   | 5                    | 36.2     | 113.1     | 3.4                     | 61.5                                              |
| 64    | Wafangdian       | Liaoning | 2                    | 39.6     | 122.0     | 1.0                     | 61.2                                              |
| 65    | Nanchong         | Sichuan  | 6                    | 0.0      | 106.1     | 6.3                     | 61.1                                              |
| 66    | Liuzhou          | Guangxi  | 6                    | 24.3     | 109.4     | 3.8                     | 60.7                                              |
| 67    | Tongchuan        | Shaanxi  | 4                    | 35.1     | 109.1     | 0.8                     | 60.6                                              |
| 68    | Yangquan         | Shanxi   | 6                    | 37.9     | 113.6     | 1.4                     | 60.3                                              |
| 69    | Yibin            | Sichuan  | 6                    | 29.8     | 104.6     | 4.5                     | 60.2                                              |
| 70    | Wuhu             | Anhui    | 4                    | 31.3     | 118.4     | 3.6                     | 60.2                                              |
| 71    | Yangzhou         | Jiangsu  | 4                    | 32.4     | 119.4     | 4.5                     | 59.8                                              |
| 72    | Zhangqiu         | Shandong | 2                    | 36.7     | 117.5     | 1.0                     | 59.8                                              |
| 73    | Nantong          | Jiangsu  | 5                    | 32.0     | 120.9     | 7.3                     | 59.8                                              |

| Order | City        | Province  | Number<br>s of sites | Latitude | Longitude | Population<br>(Million) | PM <sub>2.5</sub><br>( $\mu\text{g}/\text{m}^3$ ) |
|-------|-------------|-----------|----------------------|----------|-----------|-------------------------|---------------------------------------------------|
| 74    | Luzhou      | Sichuan   | 4                    | 28.9     | 105.4     | 4.2                     | 59.7                                              |
| 75    | Rizhao      | Shandong  | 3                    | 35.4     | 119.5     | 2.8                     | 59.6                                              |
| 76    | Huzhou      | Zhejiang  | 3                    | 30.9     | 120.1     | 2.9                     | 59.5                                              |
| 77    | Yiwu        | Zhejiang  | 2                    | 29.3     | 120.1     | 0.8                     | 59.3                                              |
| 78    | Xi'an       | Shaanxi   | 13                   | 34.3     | 109.0     | 8.6                     | 59.2                                              |
| 79    | Chongqing   | Chongqing | 17                   | 29.6     | 106.5     | 29.7                    | 59.1                                              |
| 80    | Hangzhou    | Zhejiang  | 11                   | 30.3     | 120.2     | 8.8                     | 59.0                                              |
| 81    | Liyang      | Jiangsu   | 2                    | 31.4     | 119.5     | 0.8                     | 59.0                                              |
| 82    | Taicang     | Jiangsu   | 2                    | 31.5     | 121.1     | 0.5                     | 58.9                                              |
| 83    | Laixi       | Shandong  | 2                    | 36.9     | 120.5     | 0.7                     | 58.9                                              |
| 84    | Jinzhou     | Liaoning  | 5                    | 41.1     | 121.2     | 3.1                     | 58.8                                              |
| 85    | Linan       | Zhejiang  | 2                    | 30.2     | 119.7     | 0.5                     | 58.7                                              |
| 86    | Shaoxing    | Zhejiang  | 3                    | 30.0     | 120.6     | 4.9                     | 58.5                                              |
| 87    | Wujiang     | Jiangsu   | 3                    | 31.2     | 120.6     | 0.8                     | 58.2                                              |
| 88    | Fuyang      | Zhejiang  | 2                    | 30.1     | 120.0     | 0.7                     | 58.1                                              |
| 89    | Laizhou     | Shandong  | 2                    | 37.2     | 119.9     | 0.9                     | 57.9                                              |
| 90    | Pingdu      | Shandong  | 2                    | 36.8     | 120.0     | 1.4                     | 57.9                                              |
| 91    | Jinhua      | Zhejiang  | 3                    | 29.1     | 119.6     | 5.4                     | 57.8                                              |
| 92    | Weinan      | Shaanxi   | 4                    | 34.5     | 109.5     | 5.3                     | 57.8                                              |
| 93    | Jiaonan     | Shandong  | 2                    | 35.9     | 120.0     | 0.8                     | 57.8                                              |
| 94    | Fushun      | Liaoning  | 6                    | 42.0     | 124.0     | 2.2                     | 57.6                                              |
| 95    | Xining      | Qinghai   | 4                    | 36.6     | 101.7     | 2.2                     | 57.1                                              |
| 96    | Qinhuangdao | Hebei     | 5                    | 40.0     | 119.6     | 3.0                     | 57.0                                              |
| 97    | Jilin       | Jilin     | 7                    | 43.9     | 126.6     | 4.3                     | 56.8                                              |
| 98    | Yixing      | Jiangsu   | 2                    | 31.4     | 119.8     | 1.1                     | 56.6                                              |
| 99    | Guilin      | Guangxi   | 4                    | 25.3     | 110.3     | 4.8                     | 56.6                                              |
| 100   | Xianyang    | Shaanxi   | 4                    | 34.4     | 108.7     | 4.9                     | 56.0                                              |
| 101   | Panjin      | Liaoning  | 3                    | 41.1     | 122.1     | 1.3                     | 56.0                                              |
| 102   | Lianyungang | Jiangsu   | 4                    | 34.6     | 119.2     | 4.4                     | 55.7                                              |
| 103   | Changde     | Hunan     | 5                    | 29.1     | 111.7     | 5.7                     | 55.7                                              |
| 104   | Lanzhou     | Gansu     | 5                    | 36.0     | 103.7     | 3.6                     | 55.6                                              |
| 105   | Changshu    | Jiangsu   | 3                    | 31.6     | 120.7     | 1.1                     | 55.5                                              |
| 106   | Haimen      | Jiangsu   | 2                    | 31.9     | 121.2     | 1.0                     | 55.3                                              |
| 107   | Benxi       | Liaoning  | 6                    | 41.3     | 123.7     | 1.5                     | 55.1                                              |
| 108   | Jiaxing     | Zhejiang  | 3                    | 30.8     | 120.8     | 4.6                     | 54.8                                              |
| 109   | Zhaoyuan    | Shandong  | 2                    | 37.4     | 120.4     | 0.6                     | 54.7                                              |
| 110   | Jintan      | Jiangsu   | 2                    | 31.7     | 119.6     | 0.6                     | 54.2                                              |
| 111   | Huludao     | Liaoning  | 4                    | 40.7     | 120.9     | 2.8                     | 53.7                                              |
| 112   | Baoji       | Shaanxi   | 8                    | 34.4     | 107.2     | 3.7                     | 53.6                                              |

| Order | City        | Province          | Number<br>s of sites | Latitude | Longitude | Population<br>(Million) | PM <sub>2.5</sub><br>( $\mu\text{g}/\text{m}^3$ ) |
|-------|-------------|-------------------|----------------------|----------|-----------|-------------------------|---------------------------------------------------|
| 113   | Shanghai    | Shanghai          | 10                   | 31.2     | 121.5     | 24.2                    | 53.0                                              |
| 114   | Zhangjiajie | Hunan             | 4                    | 29.1     | 110.5     | 1.5                     | 52.7                                              |
| 115   | Yancheng    | Jiangsu           | 4                    | 33.4     | 120.1     | 7.2                     | 52.7                                              |
| 116   | Jiaozhou    | Shandong          | 2                    | 36.3     | 120.0     | 0.8                     | 52.4                                              |
| 117   | Qingdao     | Shandong          | 9                    | 36.1     | 120.3     | 8.8                     | 52.1                                              |
| 118   | Mudanjiang  | Heilongjiang      | 5                    | 44.6     | 129.6     | 2.8                     | 52.0                                              |
| 119   | Yueyang     | Hunan             | 6                    | 29.4     | 113.1     | 5.5                     | 51.8                                              |
| 120   | Deyang      | Sichuan           | 4                    | 31.1     | 104.4     | 3.5                     | 51.6                                              |
| 121   | Zunyi       | Guizhou           | 5                    | 27.7     | 106.9     | 6.1                     | 51.5                                              |
| 122   | Kunshan     | Jiangsu           | 2                    | 31.4     | 121.0     | 0.7                     | 50.7                                              |
| 123   | Jimo        | Shandong          | 2                    | 36.4     | 120.5     | 1.1                     | 50.5                                              |
| 124   | Dalian      | Liaoning          | 10                   | 38.9     | 121.6     | 5.9                     | 48.8                                              |
| 125   | Baotou      | Inner<br>Mongolia | 6                    | 40.6     | 110.0     | 2.8                     | 48.7                                              |
| 126   | Dandong     | Liaoning          | 4                    | 40.1     | 124.4     | 2.4                     | 48.7                                              |
| 127   | Yantai      | Shandong          | 6                    | 37.5     | 121.4     | 7.0                     | 47.8                                              |
| 128   | Chengde     | Hebei             | 5                    | 41.0     | 117.9     | 3.5                     | 47.6                                              |
| 129   | Chaozhou    | Guangdong         | 3                    | 23.7     | 116.6     | 2.7                     | 47.3                                              |
| 130   | Quzhou      | Zhejiang          | 3                    | 29.0     | 118.9     | 2.1                     | 47.1                                              |
| 131   | Rushan      | Shandong          | 2                    | 36.9     | 121.5     | 0.6                     | 46.9                                              |
| 132   | Yinchuan    | Ningxia           | 6                    | 38.5     | 106.3     | 2.1                     | 46.5                                              |
| 133   | Nanchang    | Jiangxi           | 9                    | 28.7     | 115.9     | 5.1                     | 46.5                                              |
| 134   | Ningbo      | Zhejiang          | 8                    | 29.9     | 121.6     | 7.7                     | 46.3                                              |
| 135   | Jinyang     | Sichuan           | 4                    | 31.5     | 104.7     | 4.7                     | 46.2                                              |
| 136   | Yan'an      | Shaanxi           | 4                    | 36.6     | 109.5     | 2.2                     | 45.7                                              |
| 137   | Taizhou     | Zhejiang          | 3                    | 28.6     | 121.4     | 6.0                     | 45.3                                              |
| 138   | Wenzhou     | Zhejiang          | 4                    | 28.0     | 120.7     | 9.2                     | 45.3                                              |
| 139   | Zhaoqing    | Guangdong         | 4                    | 23.1     | 112.4     | 4.0                     | 45.1                                              |
| 140   | Penglai     | Shandong          | 2                    | 37.8     | 120.8     | 0.5                     | 45.0                                              |
| 141   | Nanning     | Guangxi           | 8                    | 22.8     | 108.3     | 6.9                     | 45.0                                              |
| 142   | Shizuishan  | Ningxia           | 4                    | 39.0     | 106.4     | 0.8                     | 44.9                                              |
| 143   | Wendeng     | Shandong          | 2                    | 37.2     | 122.1     | 0.6                     | 44.1                                              |
| 144   | Guiyang     | Guizhou           | 11                   | 26.6     | 106.7     | 4.4                     | 42.9                                              |
| 145   | Jieyang     | Guangdong         | 4                    | 23.6     | 116.4     | 6.0                     | 42.9                                              |
| 146   | Jinchang    | Gansu             | 3                    | 38.5     | 102.2     | 0.5                     | 42.8                                              |
| 147   | Lishui      | Zhejiang          | 3                    | 28.5     | 119.9     | 2.1                     | 42.6                                              |
| 148   | Yingkou     | Liaoning          | 4                    | 40.7     | 122.2     | 2.3                     | 42.4                                              |
| 149   | Chifeng     | Inner<br>Mongolia | 4                    | 42.3     | 119.0     | 4.3                     | 42.4                                              |

| Order | City        | Province          | Number<br>s of sites | Latitude | Longitude | Population<br>(Million) | PM <sub>2.5</sub><br>( $\mu\text{g}/\text{m}^3$ ) |
|-------|-------------|-------------------|----------------------|----------|-----------|-------------------------|---------------------------------------------------|
| 150   | Guangzhou   | Guangdong         | 11                   | 23.2     | 113.2     | 12.9                    | 42.4                                              |
| 151   | Jiangmen    | Guangdong         | 4                    | 22.6     | 113.1     | 4.5                     | 41.5                                              |
| 152   | Jiujiang    | Jiangxi           | 8                    | 29.7     | 116.0     | 5.0                     | 41.4                                              |
| 153   | Hohhot      | Inner<br>Mongolia | 8                    | 40.8     | 111.7     | 3.0                     | 41.2                                              |
| 154   | Daqing      | Heilongjian<br>g  | 5                    | 46.6     | 125.1     | 2.9                     | 41.0                                              |
| 155   | Foshan      | Guangdong         | 8                    | 23.1     | 113.1     | 7.3                     | 40.8                                              |
| 156   | Shaoguan    | Guangdong         | 5                    | 24.8     | 113.6     | 2.9                     | 40.1                                              |
| 157   | Datong      | Shanxi            | 6                    | 40.1     | 113.3     | 3.4                     | 39.8                                              |
| 158   | Dongguan    | Guangdong         | 5                    | 23.0     | 113.8     | 8.3                     | 39.2                                              |
| 159   | Jiayuguan   | Gansu             | 2                    | 39.8     | 98.2      | 0.2                     | 38.7                                              |
| 160   | Rongcheng   | Shandong          | 2                    | 37.2     | 122.4     | 0.7                     | 38.6                                              |
| 161   | Weihai      | Shandong          | 3                    | 37.5     | 122.1     | 2.8                     | 38.4                                              |
| 162   | Meizhou     | Guangdong         | 3                    | 24.6     | 116.1     | 4.3                     | 38.0                                              |
| 163   | Heyuan      | Guangdong         | 3                    | 23.7     | 114.7     | 3.0                     | 37.9                                              |
| 164   | Qingyuan    | Guangdong         | 3                    | 23.7     | 113.0     | 3.8                     | 36.7                                              |
| 165   | Shantou     | Guangdong         | 6                    | 23.4     | 116.7     | 5.5                     | 36.0                                              |
| 166   | Qiqihar     | Heilongjian<br>g  | 5                    | 47.3     | 123.9     | 5.4                     | 35.8                                              |
| 167   | Zhongshan   | Guangdong         | 4                    | 22.5     | 113.4     | 3.2                     | 35.6                                              |
| 168   | Maoming     | Guangdong         | 4                    | 21.7     | 110.9     | 6.0                     | 35.2                                              |
| 169   | Panzhuhua   | Sichuan           | 5                    | 26.6     | 101.7     | 1.2                     | 35.1                                              |
| 170   | Karamay     | Xinjiang          | 5                    | 45.6     | 84.8      | 0.7                     | 34.8                                              |
| 171   | Yangjiang   | Guangdong         | 3                    | 21.9     | 112.0     | 2.5                     | 34.4                                              |
| 172   | Xiamen      | Fujian            | 4                    | 24.5     | 118.1     | 3.6                     | 34.1                                              |
| 173   | Zhuhai      | Guangdong         | 4                    | 22.3     | 113.5     | 1.6                     | 33.8                                              |
| 174   | Qujing      | Yunnan            | 2                    | 25.5     | 103.8     | 6.3                     | 32.9                                              |
| 175   | Yunfu       | Guangdong         | 3                    | 22.9     | 112.0     | 2.4                     | 32.4                                              |
| 176   | Shenzhen    | Guangdong         | 11                   | 22.6     | 114.1     | 10.6                    | 32.0                                              |
| 177   | Kunming     | Yunnan            | 7                    | 25.0     | 102.7     | 5.4                     | 31.9                                              |
| 178   | Fuzhou      | Fujian            | 6                    | 26.1     | 119.3     | 7.2                     | 31.8                                              |
| 179   | Shanwei     | Guangdong         | 3                    | 22.8     | 115.4     | 3.0                     | 30.9                                              |
| 180   | Huizhou     | Guangdong         | 5                    | 23.1     | 114.4     | 4.7                     | 30.4                                              |
| 181   | Beihai      | Guangxi           | 4                    | 21.5     | 109.1     | 1.6                     | 30.2                                              |
| 182   | Quanzhou    | Fujian            | 4                    | 24.9     | 118.6     | 8.2                     | 30.1                                              |
| 183   | Zhoushan    | Zhejiang          | 3                    | 30.0     | 122.1     | 1.1                     | 30.0                                              |
| 184   | Yuxi        | Yunnan            | 3                    | 24.4     | 102.5     | 2.3                     | 28.8                                              |
| 185   | Zhanjiang   | Guangdong         | 6                    | 21.2     | 110.4     | 7.2                     | 27.9                                              |
| 186   | Zhangjiakou | Hebei             | 5                    | 40.8     | 114.9     | 4.4                     | 27.1                                              |

| Order | City   | Province          | Number<br>s of sites | Latitude | Longitude | Population<br>(Million) | PM <sub>2.5</sub><br>( $\mu\text{g}/\text{m}^3$ ) |
|-------|--------|-------------------|----------------------|----------|-----------|-------------------------|---------------------------------------------------|
| 187   | Ordos  | Inner<br>Mongolia | 5                    | 39.8     | 110.0     | 2.0                     | 26.5                                              |
| 188   | Lhasa  | Tibet             | 6                    | 30.0     | 91.1      | 0.5                     | 22.8                                              |
| 189   | Haikou | Hainan            | 5                    | 20.0     | 110.4     | 2.2                     | 21.7                                              |
| 190   | Sanya  | Hainan            | 2                    | 18.3     | 109.5     | 0.7                     | 17.7                                              |

**Table S2.** PM<sub>2.5</sub> and PM<sub>10</sub> concentrations ( $\mu\text{g}/\text{m}^3$ ) in each season in 2014/2015 in 190 cities of China.

| City         | PM <sub>2.5</sub> |        |        |       |        | PM <sub>10</sub> |        |        |       |        |
|--------------|-------------------|--------|--------|-------|--------|------------------|--------|--------|-------|--------|
|              | Yearly mean       | Spring | Summer | Fall  | Winter | Yearly mean      | Spring | Summer | Fall  | Winter |
| Baoding      | 118.8             | 89.0   | 78.3   | 136.1 | 185.4  | 203.8            | 183.8  | 136.5  | 227.2 | 278.0  |
| Xingtai      | 109.6             | 94.2   | 77.9   | 127.3 | 141.4  | 195.9            | 198.6  | 140.0  | 215.1 | 230.0  |
| Shijiazhuang | 101.4             | 90.8   | 83.4   | 109.8 | 126.6  | 173.2            | 171.5  | 141.4  | 179.3 | 206.2  |
| Handan       | 100.0             | 82.8   | 80.5   | 113.2 | 133.5  | 174.8            | 163.4  | 135.2  | 188.8 | 221.0  |
| Dezhou       | 97.6              | 85.4   | 77.5   | 103.8 | 127.7  | 150.5            | 150.5  | 113.6  | 149.5 | 188.2  |
| Hengshui     | 96.5              | 79.7   | 75.8   | 109.9 | 130.4  | 181.0            | 176.6  | 131.0  | 185.7 | 236.6  |
| Liaocheng    | 93.9              | 80.1   | 75.3   | 102.9 | 121.6  | 161.1            | 150.9  | 138.2  | 174.0 | 184.5  |
| Zhengzhou    | 93.2              | 87.2   | 61.0   | 97.7  | 129.1  | 158.2            | 155.2  | 118.1  | 153.1 | 207.4  |
| Heze         | 93.0              | 81.1   | 66.0   | 103.5 | 125.4  | 152.9            | 146.0  | 103.9  | 158.6 | 205.2  |
| Laiwu        | 91.8              | 84.3   | 75.9   | 92.9  | 116.9  | 136.0            | 136.4  | 114.8  | 133.6 | 159.1  |
| Tangshan     | 91.5              | 88.7   | 77.0   | 95.8  | 112.7  | 155.7            | 163.0  | 131.0  | 156.8 | 178.2  |
| Zibo         | 89.7              | 86.1   | 74.1   | 92.0  | 107.6  | 163.4            | 165.3  | 135.5  | 162.2 | 189.9  |
| Anyang       | 89.6              | 74.9   | 67.1   | 88.0  | 133.3  | 140.1            | 129.9  | 113.9  | 130.3 | 189.6  |
| Langfang     | 87.8              | 77.3   | 69.2   | 104.8 | 110.1  | 142.2            | 142.1  | 112.9  | 161.6 | 163.5  |
| Linyi        | 85.8              | 82.1   | 61.5   | 81.5  | 119.4  | 162.0            | 161.4  | 137.5  | 155.3 | 194.2  |
| Jiaozuo      | 84.8              | 89.9   | 67.4   | 72.3  | 107.7  | 139.9            | 154.6  | 107.2  | 114.3 | 178.8  |
| Zaozhuang    | 84.6              | 82.6   | 66.2   | 72.3  | 118.1  | 158.9            | 170.3  | 122.3  | 138.9 | 200.2  |
| Jinan        | 84.6              | 81.3   | 73.2   | 86.7  | 98.1   | 164.4            | 170.8  | 131.5  | 165.9 | 187.3  |
| Yichang      | 84.4              | 72.6   | 57.5   | 72.7  | 138.8  | 126.3            | 114.4  | 96.0   | 112.8 | 186.1  |
| Shouguang    | 84.0              | 81.0   | 70.8   | 79.7  | 104.9  | 143.6            | 161.4  | 114.3  | 130.4 | 168.6  |
| Binzhou      | 80.4              | 79.4   | 66.0   | 80.3  | 96.3   | 129.3            | 129.8  | 107.4  | 133.9 | 145.9  |
| Beijing      | 79.8              | 78.2   | 68.0   | 90.4  | 81.4   | 110.2            | 119.7  | 87.2   | 120.8 | 114.4  |
| Tianjin      | 79.7              | 72.7   | 63.4   | 88.4  | 106.8  | 129.1            | 130.0  | 102.4  | 129.4 | 157.3  |



|              |      |       |      |       |       |       |       |       |       |       |
|--------------|------|-------|------|-------|-------|-------|-------|-------|-------|-------|
| Jining       | 79.1 | 70.7  | 73.5 | 79.7  | 95.2  | 141.8 | 143.3 | 106.6 | 139.0 | 177.8 |
| Pingdingshan | 79.0 | 72.3  | 58.2 | 79.0  | 108.5 | 131.9 | 125.8 | 99.1  | 125.6 | 179.1 |
| Cangzhou     | 78.5 | 72.5  | 66.2 | 85.8  | 101.5 | 137.2 | 131.4 | 107.1 | 150.8 | 172.8 |
| Jingzhou     | 77.8 | 67.8  | 60.7 | 76.4  | 109.6 | 125.9 | 115.4 | 102.4 | 125.1 | 164.2 |
| Kaifeng      | 74.8 | 66.3  | 59.5 | 81.4  | 95.0  | 124.1 | 127.7 | 95.7  | 125.9 | 145.8 |
| Shenyang     | 74.1 | 63.5  | 49.7 | 86.7  | 100.1 | 123.3 | 113.1 | 87.0  | 142.5 | 154.2 |
| Wuhan        | 73.3 | 61.2  | 56.8 | 71.2  | 107.9 | 104.9 | 98.4  | 93.8  | 103.5 | 126.0 |
| Hefei        | 73.2 | 66.3  | 68.4 | 74.6  | 85.7  | 104.0 | 95.8  | 101.3 | 111.5 | 110.1 |
| Dongying     | 72.9 | 71.1  | 60.0 | 73.0  | 88.0  | 137.2 | 154.4 | 118.9 | 130.2 | 139.4 |
| Zigong       | 72.6 | 62.5  | 45.2 | 64.1  | 121.9 | 109.8 | 102.7 | 80.6  | 95.0  | 163.4 |
| Weifang      | 72.6 | 65.5  | 57.5 | 80.2  | 89.4  | 139.8 | 143.8 | 111.7 | 142.1 | 160.2 |
| Harbin       | 72.1 | 47.7  | 35.9 | 100.0 | 112.9 | 108.1 | 87.2  | 62.6  | 137.7 | 152.0 |
| Sanmenxia    | 72.0 | 71.4  | 57.9 | 69.9  | 88.8  | 125.7 | 134.0 | 100.4 | 116.9 | 148.9 |
| Jiangyin     | 71.2 | 72.5  | 61.2 | 59.5  | 91.6  | 106.8 | 108.8 | 90.5  | 91.9  | 136.0 |
| Korla        | 70.6 | 108.4 | 38.1 | 58.4  | 64.9  | 252.8 | 509.4 | 112.1 | 176.8 | 127.6 |
| Tai'an       | 70.2 | 59.8  | 60.0 | 71.3  | 93.1  | 126.9 | 117.9 | 101.0 | 124.5 | 167.2 |
| Luoyang      | 69.5 | 73.5  | 46.3 | 68.3  | 88.7  | 120.7 | 132.9 | 91.5  | 108.2 | 145.9 |
| Anshan       | 69.2 | 60.7  | 56.4 | 79.9  | 82.5  | 117.6 | 112.2 | 93.2  | 133.8 | 133.1 |
| Changsha     | 68.3 | 51.6  | 55.7 | 74.4  | 97.2  | 84.6  | 74.3  | 80.8  | 92.5  | 94.4  |
| Taizhou      | 68.3 | 62.5  | 65.4 | 61.2  | 86.1  | 105.9 | 105.3 | 90.0  | 93.2  | 135.2 |
| Nanjing      | 67.8 | 62.6  | 65.1 | 66.5  | 78.8  | 112.7 | 110.7 | 92.9  | 111.5 | 136.2 |
| Wuxi         | 66.4 | 63.9  | 55.5 | 61.1  | 86.2  | 103.1 | 101.0 | 83.5  | 98.5  | 130.0 |
| Changzhou    | 66.4 | 64.8  | 55.5 | 57.5  | 88.3  | 103.0 | 104.5 | 83.7  | 93.9  | 129.6 |
| Zhangjiagang | 66.0 | 61.1  | 52.7 | 58.4  | 91.9  | 118.4 | 105.7 | 98.9  | 119.0 | 150.0 |
| Zhuji        | 65.1 | 79.4  | 88.7 | 56.9  | 40.1  | 98.6  | 136.0 | 106.4 | 91.8  | 72.8  |
| Xuzhou       | 64.7 | 65.3  | 51.8 | 48.8  | 92.8  | 120.3 | 126.4 | 86.6  | 102.8 | 163.1 |
| Suqian       | 64.5 | 64.3  | 61.7 | 51.2  | 81.1  | 111.0 | 115.1 | 99.8  | 90.8  | 137.0 |

|            |      |      |      |      |       |       |       |       |       |       |
|------------|------|------|------|------|-------|-------|-------|-------|-------|-------|
| Changchun  | 64.4 | 46.9 | 42.6 | 83.0 | 91.1  | 110.1 | 96.3  | 86.7  | 137.3 | 124.6 |
| Suzhou     | 64.4 | 62.7 | 56.2 | 55.7 | 83.7  | 87.8  | 84.7  | 78.3  | 80.4  | 108.8 |
| Zhuzhou    | 64.3 | 50.5 | 50.9 | 66.2 | 94.2  | 96.7  | 82.4  | 74.7  | 99.5  | 135.0 |
| Jurong     | 64.1 | 65.0 | 58.9 | 51.8 | 80.8  | 70.4  | 78.2  | 67.6  | 62.7  | 73.2  |
| Urumchi    | 64.1 | 48.9 | 33.3 | 51.2 | 128.1 | 147.1 | 134.3 | 125.2 | 136.9 | 196.1 |
| Xiangtan   | 63.6 | 49.1 | 53.8 | 68.6 | 87.7  | 101.3 | 87.5  | 81.2  | 108.2 | 132.9 |
| Taiyuan    | 62.8 | 52.3 | 45.6 | 77.7 | 79.2  | 117.3 | 110.9 | 92.9  | 138.8 | 128.9 |
| Maanshan   | 62.6 | 59.8 | 58.9 | 55.2 | 77.6  | 94.5  | 96.2  | 91.7  | 85.1  | 104.6 |
| Huai'an    | 62.5 | 54.4 | 55.5 | 52.1 | 90.5  | 98.6  | 98.9  | 78.3  | 79.7  | 137.4 |
| Chengdu    | 62.2 | 57.4 | 40.6 | 52.5 | 99.9  | 104.7 | 100.1 | 69.1  | 89.8  | 161.2 |
| Zhenjiang  | 61.9 | 59.2 | 63.0 | 51.1 | 75.4  | 104.4 | 104.7 | 99.6  | 96.6  | 116.7 |
| Linfen     | 61.8 | 56.6 | 55.2 | 59.2 | 77.8  | 95.4  | 99.8  | 80.4  | 84.6  | 115.4 |
| Changzhi   | 61.5 | 48.2 | 47.5 | 78.1 | 76.7  | 106.9 | 105.3 | 87.5  | 115.0 | 120.3 |
| Wafangdian | 61.2 | 56.8 | 49.6 | 68.2 | 70.9  | 74.9  | 86.9  | 64.3  | 80.9  | 75.8  |
| Nanchong   | 61.1 | 51.8 | 47.3 | 50.9 | 97.7  | 93.1  | 86.6  | 72.5  | 77.0  | 138.7 |
| Liuzhou    | 60.7 | 48.9 | 42.7 | 69.2 | 86.2  | 86.7  | 69.1  | 66.6  | 103.7 | 113.2 |
| Tongchuan  | 60.6 | 59.8 | 41.2 | 61.6 | 80.0  | 113.2 | 120.6 | 80.3  | 107.0 | 142.5 |
| Yangquan   | 60.3 | 55.2 | 52.5 | 72.7 | 62.4  | 136.3 | 133.2 | 115.5 | 161.3 | 136.2 |
| Yibin      | 60.2 | 57.3 | 36.1 | 48.2 | 100.3 | 89.4  | 91.0  | 57.6  | 71.3  | 137.4 |
| Wuhu       | 60.2 | 57.4 | 63.7 | 48.3 | 72.5  | 89.7  | 94.3  | 96.0  | 64.6  | 102.6 |
| Yangzhou   | 59.8 | 62.0 | 64.1 | 41.4 | 71.1  | 108.9 | 110.7 | 107.5 | 82.3  | 134.6 |
| Zhangqiu   | 59.8 | 64.2 | 51.1 | 49.2 | 75.0  | 106.7 | 126.3 | 72.0  | 84.8  | 143.7 |
| Nantong    | 59.8 | 56.5 | 51.1 | 51.6 | 81.2  | 91.3  | 88.4  | 71.8  | 81.8  | 124.0 |
| Luzhou     | 59.7 | 55.2 | 39.2 | 45.3 | 100.5 | 88.4  | 84.8  | 57.8  | 66.6  | 145.8 |
| Rizhao     | 59.6 | 56.7 | 43.9 | 56.2 | 82.3  | 107.2 | 113.8 | 76.6  | 100.2 | 136.2 |
| Huzhou     | 59.5 | 55.5 | 46.0 | 54.8 | 83.3  | 79.2  | 75.2  | 66.9  | 77.7  | 98.4  |
| Yiwu       | 59.3 | 61.1 | 44.4 | 49.2 | 83.3  | 93.8  | 91.5  | 72.1  | 79.1  | 133.1 |

|             |      |      |      |      |       |       |       |      |       |       |
|-------------|------|------|------|------|-------|-------|-------|------|-------|-------|
| Xi'an       | 59.2 | 54.1 | 41.8 | 66.6 | 76.2  | 128.5 | 130.4 | 92.3 | 127.0 | 163.8 |
| Chongqing   | 59.1 | 42.2 | 33.2 | 65.7 | 100.8 | 90.5  | 73.3  | 59.6 | 98.8  | 136.3 |
| Hangzhou    | 59.0 | 54.4 | 47.5 | 59.9 | 75.8  | 91.0  | 88.5  | 76.7 | 91.9  | 107.8 |
| Liyang      | 59.0 | 64.3 | 53.5 | 46.1 | 72.0  | 97.2  | 106.7 | 79.9 | 81.0  | 121.0 |
| Taicang     | 58.9 | 59.3 | 55.7 | 42.2 | 79.4  | 88.3  | 96.1  | 79.9 | 65.6  | 115.4 |
| Laixi       | 58.9 | 56.8 | 42.6 | 54.8 | 81.8  | 87.8  | 92.9  | 59.2 | 84.3  | 114.8 |
| Jinzhou     | 58.8 | 61.3 | 48.1 | 63.1 | 62.1  | 96.1  | 105.0 | 72.6 | 103.9 | 99.8  |
| Linan       | 58.7 | 65.7 | 53.1 | 46.6 | 72.2  | 101.9 | 114.1 | 99.8 | 77.6  | 122.1 |
| Shaoxing    | 58.5 | 52.4 | 47.3 | 61.6 | 74.8  | 86.5  | 81.1  | 59.1 | 90.8  | 117.0 |
| Wujiang     | 58.2 | 56.9 | 55.5 | 45.8 | 76.4  | 95.8  | 93.7  | 94.5 | 80.0  | 118.9 |
| Fuyang      | 58.1 | 53.2 | 53.1 | 52.2 | 71.9  | 101.8 | 97.0  | 81.6 | 85.8  | 140.5 |
| Laizhou     | 57.9 | 58.2 | 46.8 | 55.0 | 71.9  | 108.6 | 126.5 | 90.6 | 96.1  | 121.2 |
| Pingdu      | 57.9 | 58.2 | 48.8 | 52.5 | 72.2  | 89.7  | 108.0 | 67.3 | 80.0  | 103.8 |
| Jinhua      | 57.8 | 52.7 | 46.5 | 61.8 | 71.9  | 81.1  | 70.7  | 60.7 | 88.6  | 107.8 |
| Weinan      | 57.8 | 53.2 | 40.7 | 67.0 | 71.7  | 110.0 | 119.8 | 83.3 | 113.7 | 120.1 |
| Jiaonan     | 57.8 | 54.1 | 43.0 | 54.3 | 79.9  | 89.7  | 80.3  | 56.4 | 88.7  | 122.2 |
| Fushun      | 57.6 | 46.3 | 44.2 | 63.2 | 80.6  | 104.6 | 92.6  | 75.8 | 119.8 | 134.1 |
| Xining      | 57.1 | 58.4 | 47.7 | 57.6 | 64.1  | 114.3 | 152.4 | 81.2 | 94.8  | 116.1 |
| Qinhuangdao | 57.0 | 57.6 | 38.4 | 61.0 | 73.7  | 113.0 | 125.9 | 72.1 | 117.8 | 140.3 |
| Jilin       | 56.8 | 39.4 | 34.0 | 75.5 | 84.1  | 95.9  | 79.0  | 63.0 | 120.4 | 126.7 |
| Yixing      | 56.6 | 58.3 | 55.0 | 45.1 | 70.3  | 80.6  | 79.9  | 80.0 | 63.7  | 100.9 |
| Guilin      | 56.6 | 46.9 | 41.2 | 64.9 | 76.6  | 77.2  | 66.5  | 59.4 | 85.9  | 100.7 |
| Xianyang    | 56.0 | 52.0 | 36.9 | 64.7 | 72.0  | 111.3 | 111.9 | 83.5 | 114.6 | 135.2 |
| Panjin      | 56.0 | 53.9 | 47.2 | 56.9 | 66.6  | 85.9  | 88.7  | 65.1 | 87.5  | 101.4 |
| Lianyungang | 55.7 | 49.4 | 47.6 | 41.7 | 86.3  | 103.9 | 105.5 | 86.9 | 87.3  | 135.3 |
| Changde     | 55.7 | 46.5 | 51.9 | 56.8 | 70.8  | 85.2  | 78.3  | 73.7 | 87.1  | 103.9 |
| Lanzhou     | 55.6 | 55.0 | 46.9 | 54.2 | 66.4  | 123.7 | 161.5 | 93.0 | 101.3 | 126.2 |

|             |      |      |      |      |      |       |       |       |       |       |
|-------------|------|------|------|------|------|-------|-------|-------|-------|-------|
| Changshu    | 55.5 | 59.6 | 48.9 | 41.0 | 74.6 | 82.2  | 83.8  | 70.2  | 62.5  | 111.9 |
| Haimen      | 55.3 | 52.2 | 42.6 | 45.1 | 77.6 | 84.6  | 87.7  | 55.6  | 70.4  | 119.6 |
| Benxi       | 55.1 | 43.8 | 42.6 | 64.8 | 72.9 | 96.2  | 80.8  | 74.6  | 116.9 | 117.7 |
| Jiaxing     | 54.8 | 51.5 | 44.2 | 49.9 | 74.8 | 80.6  | 78.4  | 63.0  | 72.6  | 109.1 |
| Zhaoyuan    | 54.7 | 58.7 | 46.4 | 51.4 | 62.4 | 93.7  | 110.7 | 71.7  | 87.0  | 105.5 |
| Jintan      | 54.2 | 63.8 | 50.8 | 37.3 | 70.9 | 83.3  | 97.9  | 83.7  | 62.4  | 100.3 |
| Huludao     | 53.7 | 56.2 | 47.5 | 45.4 | 64.9 | 107.8 | 112.9 | 84.9  | 105.9 | 125.7 |
| Baoji       | 53.6 | 54.4 | 36.8 | 55.9 | 67.1 | 102.1 | 115.4 | 70.7  | 101.6 | 116.1 |
| Shanghai    | 53.0 | 53.7 | 42.1 | 42.5 | 73.6 | 73.3  | 70.8  | 57.5  | 63.5  | 102.1 |
| Zhangjiajie | 52.7 | 46.3 | 41.7 | 47.8 | 77.2 | 80.3  | 72.1  | 61.6  | 75.7  | 114.7 |
| Yancheng    | 52.7 | 47.4 | 44.6 | 43.9 | 76.7 | 88.2  | 86.3  | 73.1  | 72.8  | 121.2 |
| Jiaozhou    | 52.4 | 50.2 | 48.4 | 48.8 | 62.4 | 84.7  | 91.9  | 70.5  | 84.0  | 92.3  |
| Qingdao     | 52.1 | 51.1 | 40.2 | 48.0 | 69.6 | 102.7 | 107.2 | 82.9  | 96.8  | 122.4 |
| Mudanjiang  | 52.0 | 41.1 | 37.7 | 63.6 | 69.3 | 84.7  | 73.0  | 68.0  | 102.1 | 99.7  |
| Yueyang     | 51.8 | 44.5 | 45.7 | 51.9 | 67.5 | 111.3 | 93.7  | 102.7 | 114.8 | 140.0 |
| Deyang      | 51.6 | 51.2 | 40.3 | 38.7 | 76.5 | 84.3  | 91.2  | 69.3  | 60.6  | 113.7 |
| Zunyi       | 51.5 | 48.5 | 41.8 | 48.6 | 68.1 | 83.5  | 81.8  | 70.9  | 79.0  | 103.1 |
| Kunshan     | 50.7 | 57.7 | 46.3 | 34.6 | 67.4 | 86.2  | 95.3  | 83.5  | 63.2  | 106.6 |
| Jimo        | 50.5 | 40.4 | 38.5 | 53.1 | 70.4 | 89.7  | 85.3  | 61.1  | 96.8  | 116.0 |
| Dalian      | 48.8 | 48.4 | 42.9 | 49.0 | 54.9 | 82.6  | 90.0  | 66.2  | 80.5  | 91.2  |
| Baotou      | 48.7 | 41.1 | 35.4 | 54.3 | 66.6 | 131.5 | 141.2 | 97.1  | 141.0 | 143.6 |
| Dandong     | 48.7 | 50.7 | 35.7 | 44.0 | 63.7 | 84.6  | 88.2  | 58.5  | 78.5  | 112.0 |
| Yantai      | 47.8 | 50.3 | 43.8 | 41.7 | 54.7 | 78.1  | 89.1  | 70.3  | 67.2  | 81.9  |
| Chengde     | 47.6 | 43.4 | 44.0 | 55.9 | 50.2 | 100.0 | 102.8 | 79.9  | 122.0 | 106.0 |
| Chaozhou    | 47.3 | 45.6 | 35.4 | 51.8 | 57.1 | 58.9  | 58.2  | 41.2  | 58.5  | 77.8  |
| Quzhou      | 47.1 | 44.6 | 39.1 | 47.2 | 58.2 | 76.5  | 72.0  | 59.0  | 76.9  | 99.6  |
| Rushan      | 46.9 | 42.7 | 34.3 | 47.9 | 63.1 | 63.6  | 66.5  | 45.7  | 58.9  | 83.7  |

|            |      |      |      |      |      |       |       |      |       |       |
|------------|------|------|------|------|------|-------|-------|------|-------|-------|
| Yinchuan   | 46.5 | 40.3 | 33.8 | 50.3 | 63.9 | 109.5 | 124.2 | 75.7 | 100.3 | 132.6 |
| Nanchang   | 46.5 | 37.6 | 36.9 | 58.5 | 56.0 | 74.5  | 65.7  | 66.6 | 87.5  | 81.1  |
| Ningbo     | 46.3 | 42.0 | 29.9 | 42.2 | 72.3 | 73.2  | 67.2  | 47.7 | 68.4  | 111.3 |
| Jinyang    | 46.2 | 44.4 | 39.5 | 34.9 | 66.6 | 71.6  | 75.0  | 58.3 | 54.7  | 97.1  |
| Yan'an     | 45.7 | 43.6 | 34.7 | 45.6 | 59.8 | 112.5 | 121.2 | 90.9 | 106.3 | 128.7 |
| Taizhou    | 45.3 | 43.0 | 31.5 | 42.1 | 65.5 | 68.6  | 63.5  | 46.9 | 65.3  | 100.3 |
| Wenzhou    | 45.3 | 45.9 | 32.1 | 41.8 | 61.3 | 73.8  | 76.0  | 53.0 | 68.0  | 97.5  |
| Zhaoqing   | 45.1 | 39.2 | 32.0 | 54.8 | 56.5 | 69.1  | 59.6  | 56.9 | 80.3  | 82.9  |
| Penglai    | 45.0 | 46.9 | 35.5 | 46.1 | 51.7 | 73.4  | 95.8  | 59.5 | 63.2  | 74.6  |
| Nanning    | 45.0 | 35.2 | 24.1 | 50.9 | 73.0 | 76.8  | 61.9  | 52.3 | 86.7  | 111.4 |
| Shizuishan | 44.9 | 46.3 | 28.8 | 46.6 | 58.0 | 124.0 | 151.6 | 73.5 | 119.4 | 151.4 |
| Wendeng    | 44.1 | 39.3 | 39.7 | 44.1 | 53.7 | 65.5  | 74.8  | 51.2 | 55.4  | 80.7  |
| Guiyang    | 42.9 | 40.7 | 29.3 | 40.4 | 61.8 | 67.7  | 70.3  | 51.2 | 62.9  | 85.4  |
| Jieyang    | 42.9 | 46.5 | 34.8 | 40.3 | 48.6 | 61.8  | 68.5  | 52.1 | 60.9  | 63.4  |
| Jinchang   | 42.8 | 60.4 | 21.9 | 35.0 | 48.0 | 124.3 | 200.3 | 63.5 | 91.0  | 117.2 |
| Lishui     | 42.6 | 37.9 | 28.0 | 45.5 | 60.4 | 63.8  | 54.5  | 44.9 | 70.9  | 88.0  |
| Yingkou    | 42.4 | 46.4 | 30.3 | 37.1 | 54.5 | 71.8  | 83.7  | 50.2 | 64.5  | 85.1  |
| Chifeng    | 42.4 | 35.1 | 32.7 | 47.6 | 56.6 | 97.9  | 98.0  | 75.8 | 116.5 | 101.4 |
| Guangzhou  | 42.4 | 33.9 | 33.3 | 47.8 | 57.3 | 62.6  | 51.3  | 52.4 | 69.3  | 81.3  |
| Jiangmen   | 41.5 | 30.8 | 23.1 | 49.5 | 65.9 | 61.2  | 50.5  | 40.4 | 66.6  | 90.9  |
| Jiujiang   | 41.4 | 33.2 | 37.7 | 45.6 | 52.0 | 77.2  | 65.4  | 69.1 | 91.7  | 86.5  |
| Hohhot     | 41.2 | 34.6 | 27.6 | 43.5 | 61.2 | 112.3 | 115.0 | 91.0 | 117.0 | 125.6 |
| Daqing     | 41.0 | 35.2 | 32.5 | 39.1 | 59.0 | 62.1  | 62.0  | 50.3 | 58.9  | 77.3  |
| Foshan     | 40.8 | 32.0 | 28.4 | 49.4 | 56.3 | 60.3  | 48.8  | 45.5 | 70.1  | 80.8  |
| Shaoguan   | 40.1 | 29.9 | 32.8 | 52.6 | 48.3 | 59.6  | 44.8  | 52.6 | 76.1  | 70.1  |
| Datong     | 39.8 | 37.0 | 34.1 | 33.2 | 55.6 | 94.2  | 110.7 | 66.7 | 72.9  | 121.1 |
| Dongguan   | 39.2 | 29.5 | 28.0 | 45.8 | 56.9 | 55.8  | 42.7  | 42.4 | 65.7  | 76.9  |

|           |      |      |      |      |      |       |       |      |       |       |
|-----------|------|------|------|------|------|-------|-------|------|-------|-------|
| Jiayuguan | 38.7 | 55.5 | 27.0 | 33.0 | 33.6 | 133.4 | 196.3 | 87.0 | 118.0 | 111.2 |
| Rongcheng | 38.6 | 42.3 | 36.2 | 32.7 | 43.5 | 66.6  | 81.0  | 53.4 | 58.5  | 73.5  |
| Weihai    | 38.4 | 41.5 | 36.1 | 33.3 | 41.5 | 71.7  | 81.4  | 60.6 | 63.5  | 78.1  |
| Meizhou   | 38.0 | 33.3 | 24.7 | 45.9 | 49.5 | 58.5  | 49.8  | 45.9 | 72.6  | 68.6  |
| Heyuan    | 37.9 | 29.2 | 31.3 | 43.7 | 50.5 | 56.1  | 42.5  | 46.1 | 66.5  | 73.9  |
| Qingyuan  | 36.7 | 33.6 | 22.0 | 40.0 | 52.1 | 58.5  | 55.1  | 41.4 | 63.1  | 75.3  |
| Shantou   | 36.0 | 33.2 | 21.6 | 39.3 | 50.8 | 59.2  | 52.6  | 41.1 | 66.6  | 78.6  |
| Qiqihar   | 35.8 | 29.5 | 25.0 | 42.5 | 48.1 | 62.1  | 62.9  | 50.3 | 65.1  | 69.8  |
| Zhongshan | 35.6 | 26.8 | 19.6 | 42.7 | 56.3 | 52.8  | 39.7  | 30.8 | 64.1  | 81.2  |
| Maoming   | 35.2 | 22.8 | 18.8 | 42.5 | 60.8 | 53.1  | 38.6  | 34.0 | 63.4  | 81.3  |
| Panzhuhua | 35.1 | 38.6 | 31.5 | 25.2 | 44.0 | 72.8  | 76.4  | 70.3 | 53.8  | 89.5  |
| Karamay   | 34.8 | 26.7 | 27.5 | 30.4 | 57.4 | 71.9  | 63.2  | 60.7 | 66.8  | 99.8  |
| Yangjiang | 34.4 | 25.8 | 16.4 | 45.3 | 52.9 | 52.2  | 38.7  | 29.9 | 66.5  | 78.0  |
| Xiamen    | 34.1 | 32.8 | 26.9 | 33.8 | 43.2 | 54.3  | 52.1  | 46.0 | 55.6  | 64.2  |
| Zhuhai    | 33.8 | 23.5 | 14.5 | 40.2 | 60.6 | 54.6  | 38.7  | 34.1 | 67.8  | 83.2  |
| Qijing    | 32.9 | 36.8 | 26.0 | 32.3 | 35.0 | 54.1  | 63.2  | 39.4 | 54.1  | 56.8  |
| Yunfu     | 32.4 | 23.6 | 21.0 | 44.0 | 43.8 | 52.8  | 39.8  | 36.7 | 66.8  | 72.4  |
| Shenzhen  | 32.0 | 24.8 | 18.2 | 38.1 | 49.5 | 55.3  | 43.7  | 40.2 | 64.5  | 76.6  |
| Kunming   | 31.9 | 39.7 | 21.7 | 28.4 | 35.1 | 61.2  | 74.2  | 44.0 | 60.1  | 62.0  |
| Fuzhou    | 31.8 | 32.7 | 23.6 | 28.9 | 41.6 | 61.5  | 63.2  | 54.5 | 60.1  | 67.9  |
| Shanwei   | 30.9 | 26.5 | 15.8 | 36.5 | 46.4 | 44.1  | 38.0  | 27.2 | 49.3  | 63.9  |
| Huizhou   | 30.4 | 23.0 | 22.0 | 36.9 | 42.0 | 54.2  | 43.1  | 41.6 | 62.1  | 73.8  |
| Beihai    | 30.2 | 21.4 | 9.0  | 35.1 | 58.2 | 54.1  | 45.5  | 33.7 | 60.1  | 80.0  |
| Quanzhou  | 30.1 | 29.1 | 26.7 | 27.8 | 37.0 | 58.8  | 60.6  | 62.9 | 51.9  | 59.2  |
| Zhoushan  | 30.0 | 29.4 | 21.8 | 23.8 | 45.1 | 49.5  | 46.6  | 31.2 | 43.7  | 77.4  |
| Yuxi      | 28.8 | 38.5 | 18.3 | 23.7 | 31.3 | 49.9  | 66.5  | 34.2 | 41.8  | 51.5  |
| Zhanjiang | 27.9 | 20.4 | 14.6 | 34.3 | 44.8 | 47.6  | 36.4  | 30.4 | 57.8  | 69.7  |

|             |      |      |      |      |      |      |      |      |      |      |
|-------------|------|------|------|------|------|------|------|------|------|------|
| Zhangjiakou | 27.1 | 31.3 | 20.6 | 25.0 | 31.3 | 62.4 | 85.0 | 39.4 | 49.1 | 66.4 |
| Ordos       | 26.5 | 26.5 | 21.9 | 27.0 | 30.6 | 71.8 | 89.0 | 48.6 | 63.1 | 80.8 |
| Lhasa       | 22.8 | 23.0 | 16.5 | 23.9 | 27.9 | 53.4 | 59.1 | 39.4 | 55.8 | 57.2 |
| Haikou      | 21.7 | 15.4 | 11.7 | 24.3 | 37.6 | 39.1 | 31.1 | 26.8 | 43.3 | 57.9 |
| Sanya       | 17.7 | 15.2 | 9.6  | 19.4 | 27.6 | 33.5 | 28.0 | 24.4 | 38.5 | 45.0 |

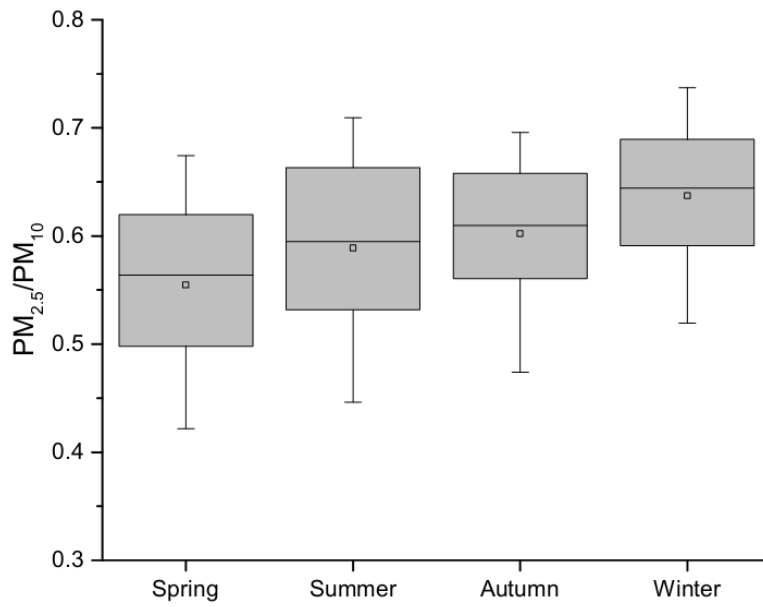

**Figure S1.** Box plot of  $PM_{2.5}/PM_{10}$  ratio in different seasons. Each box shows the median (black line), mean (square), the interquartile range (box) and the 10th percentile and 90th percentile (the whiskers).



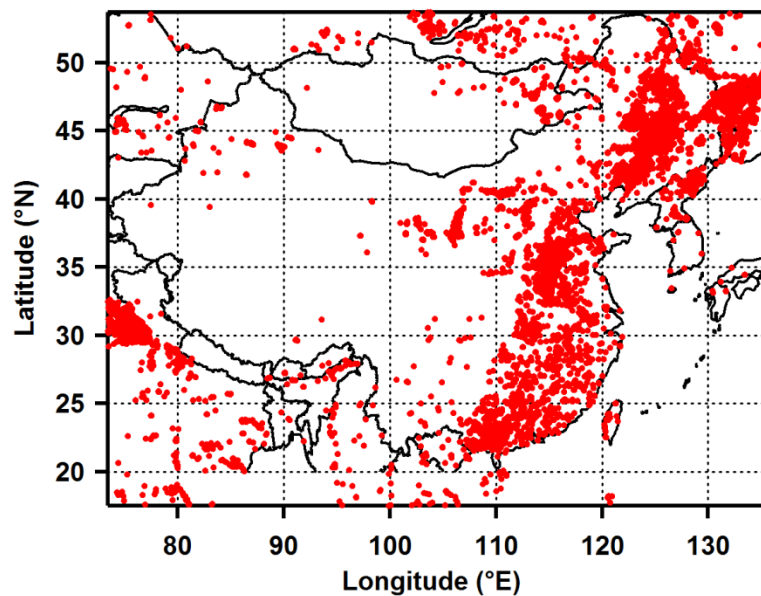

**Figure S2.** MODIS fire counts during the period from the October of 2014. Fire locations were obtained from produced by the University of Maryland and provided by NASA FIRMS operated by NASA/GSFC/ESDIS with funding provided by NASA/HQ (Available on-line <https://earthdata.nasa.gov/active-fire-data#tab-content-6>). The map was drawn by the software of Igor Pro, <http://www.wavemetrics.com/>.

NOAA HYSPLIT MODEL  
Backward trajectories ending at 0000 UTC 19 Jan 15  
GDAS Meteorological Data

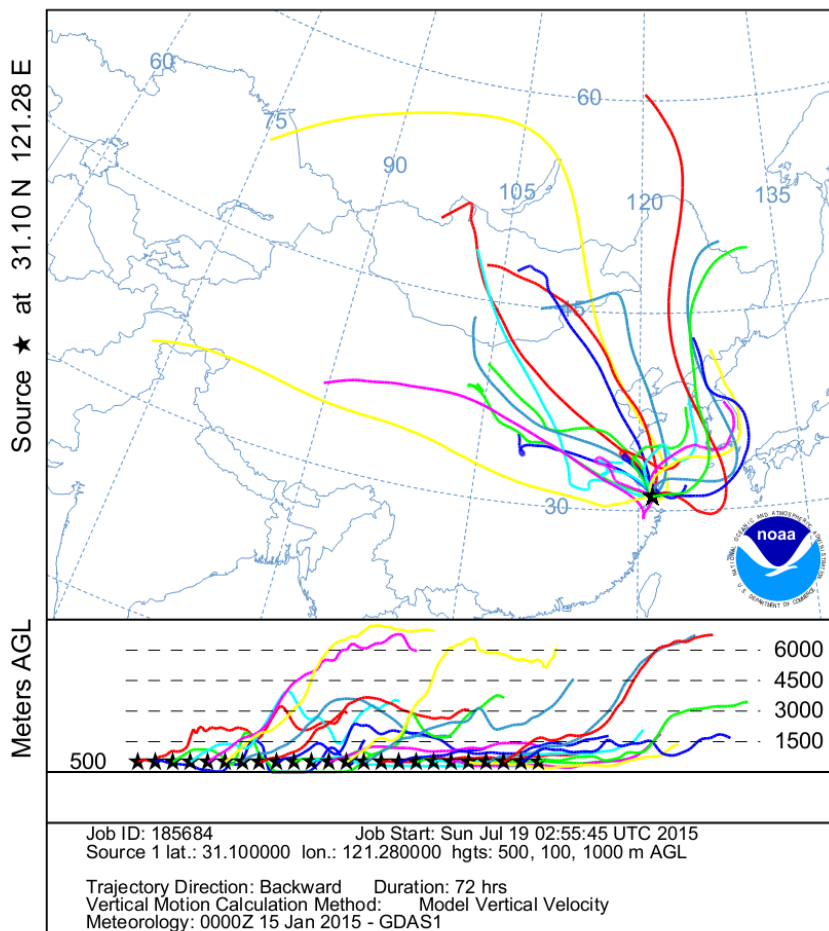

**Figure S3.** A typical 72-hour backward trajectory of air mass arriving Shanghai during winter. The trajectories were drawn using Hybrid Single Particle Lagrangian Integrated Trajectory (HYSPLIT) Model with the software HYSPLIT-WEB (<http://ready.arl.noaa.gov/HYSPLIT.php>)<sup>1, 2</sup>.

## References

1. Draxler, R.R. and Rolph, G.D., 2015. HYSPLIT (HYbrid Single-Particle Lagrangian Integrated Trajectory) Model access via NOAA ARL READY Website

<http://ready.arl.noaa.gov/HYSPLIT.php>). NOAA Air Resources Laboratory, Silver Spring, MD.

2. Rolph, G.D., 2015. Real-time Environmental Applications and Display sYstem (READY) Website (<http://ready.arl.noaa.gov>). NOAA Air Resources Laboratory, Silver Spring, MD.
